# Supplementary material for: 2D foam film coating of antimicrobial lysozyme amyloid fibrils onto cellulose nanopapers
Source: Royal Society of Chemistry journal article supplement (doi:10.1039/d3na00370a), 2023-01-01
Supplement: d3na00370a1.pdf [file d3na00370a1.pdf]

## Supplementary information for:

# 2D foam film coating of antimicrobial lysozyme amyloid fibrils onto cellulose nanopapers

*Nico Kummer<sup>a,b</sup>, Luc Huguenin-Elie<sup>a</sup>, Adrian Zeller<sup>a</sup>, Yashoda Chandorkar<sup>c</sup>, Jean Schoeller<sup>d,e</sup>, Flavia Zuber<sup>c</sup>, Qun Ren<sup>c</sup>, Ashutosh Sinha<sup>a,b</sup>, Kevin De France<sup>a,#</sup>, Peter Fischer<sup>b</sup>, Silvia Campioni<sup>\*a</sup>, Gustav Nyström<sup>\*a,b</sup>*

*<sup>a</sup>Laboratory for Cellulose & Wood Materials, Empa – Swiss Federal Laboratories for Materials Science and Technology, Überlandstrasse 129, 8600 Dübendorf, Switzerland*

*<sup>b</sup>Institute of Food Nutrition and Health, Schmelzbergstrasse 9, ETH Zurich, 8092 Zurich, Switzerland*

*<sup>c</sup>Laboratory for Biointerfaces, Empa – Swiss Federal Laboratories for Materials Science and Technology, Lerchenfeldstrasse 5, 9014 St. Gallen*

*<sup>d</sup>Laboratory for Biomimetic Membranes and Textiles, Empa – Swiss Federal Laboratories for Materials Science and Technology, Lerchenfeldstrasse 5, 9014 St. Gallen*

*<sup>e</sup>Institute for Biomechanics, Stefano-Franscini-Platz 5, ETH Zürich, 8093 Zürich, Switzerland*

\* To whom correspondence should be addressed

# present address: Department of Chemical Engineering, Queen's University, Kingston, Ontario K7L 3N6, Canada

E-Mail Gustav Nyström.: [gustav.nystroem@empa.ch](mailto:gustav.nystroem@empa.ch)

E-Mail Silvia Campioni.: [silvia.campioni@empa.ch](mailto:silvia.campioni@empa.ch)

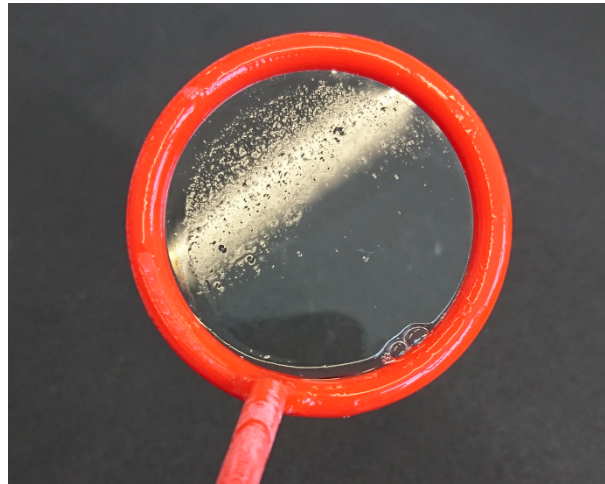

Figure S1: Photography of the loop with a HEWL amyloid 2D foam film at pH 8, showing inhomogeneity due to aggregation.

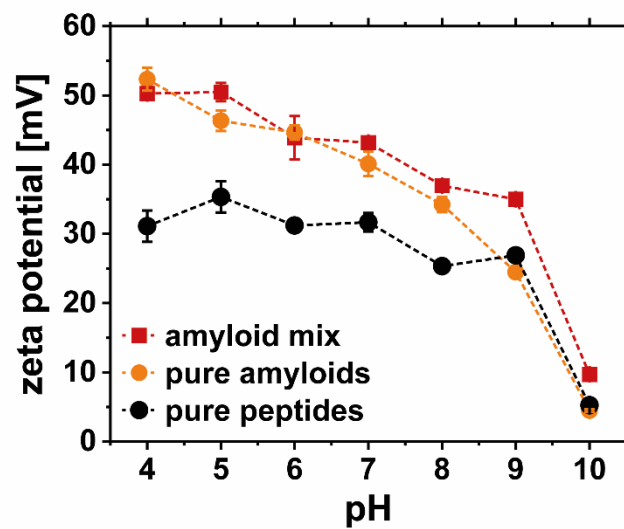

Figure S2: pH-dependent  $\zeta$  potential of the amyloid mix and the pure amyloid fibrils and peptides separated by ultrafiltration.

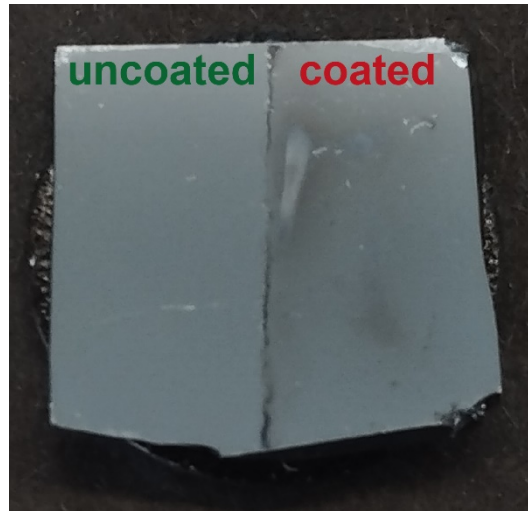

Figure S3: Photo of a silicon wafer that was covered with tape on the left side (uncoated) before depositing a layer of the 2D amyloid foam coating. After drying the tape was removed and the homogenous coating was visible on the right side (coated).

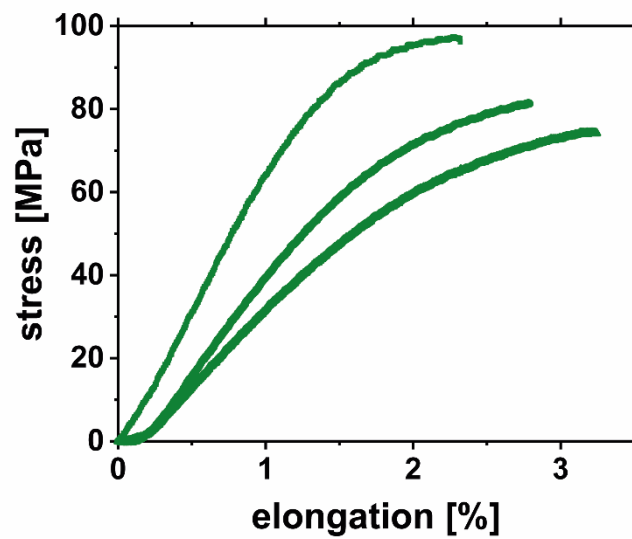

Figure S4: Stress-strain curves of the tensile tests performed on a triplicate of TO-CNF nanopaper.

Table S1: Summary of the result of the tensile tests including Elongation at break, modulus, tensile strength, and toughness, as well as water sorption behavior.

|                     |                                   |
|---------------------|-----------------------------------|
| Elongation at Break | $2.27 \pm 0.24$ %                 |
| Modulus             | $6.66 \pm 2.21$ GPa               |
| Tensile Strength    | $84.40 \pm 11.80$ MPa             |
| Toughness           | $1.38 \pm 0.06$ MJm <sup>-3</sup> |
| Swelling            | $2320 \pm 260$ %                  |

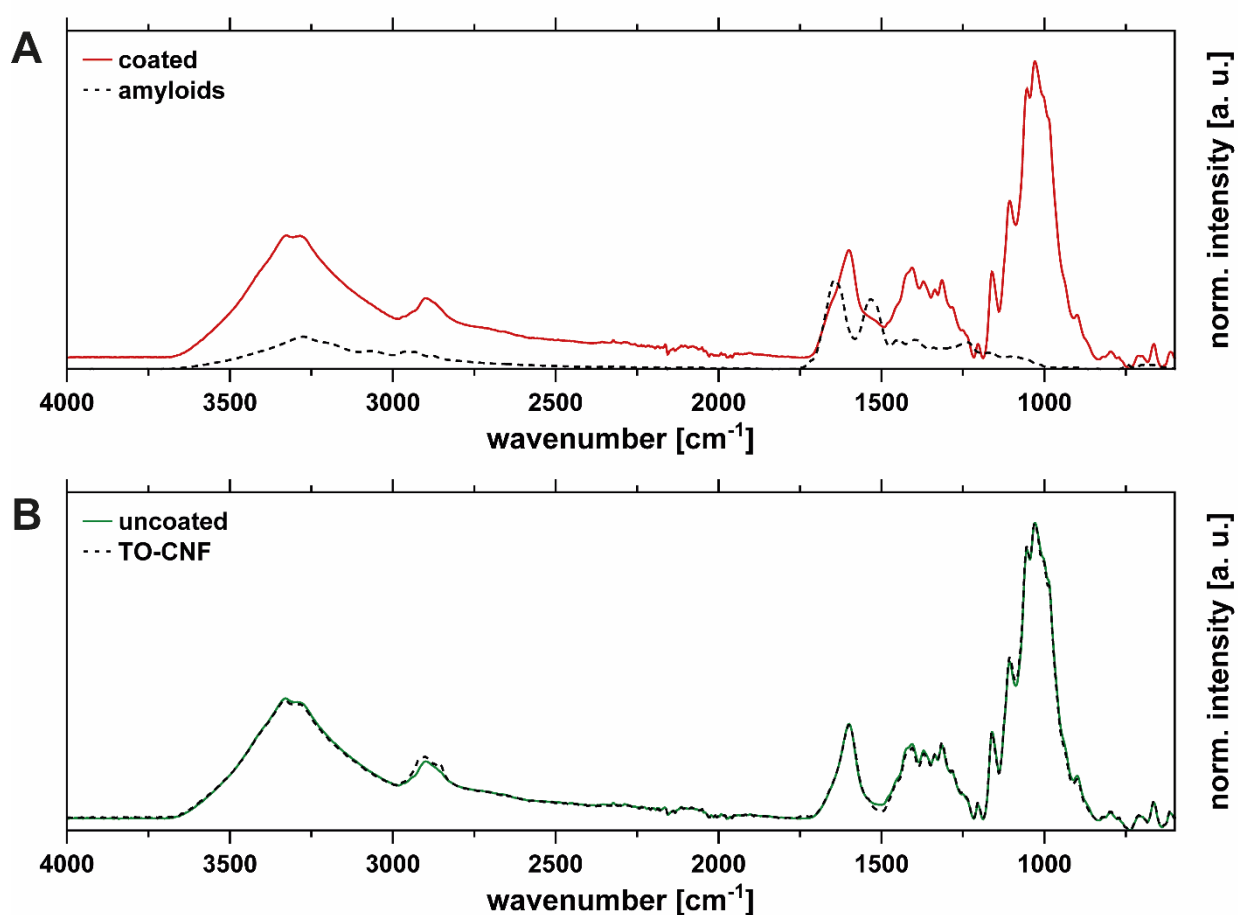

Figure S5: Full FTIR spectra of the side of the TO-CNF nanopaper coated with HEWL amyloid fibrils in red and reference dried HEWL amyloid fibril suspension in black (A). Full FTIR spectra of the uncoated side of the TO-CNF nanopaper in green and reference dried TO-CNF suspension in black (B).

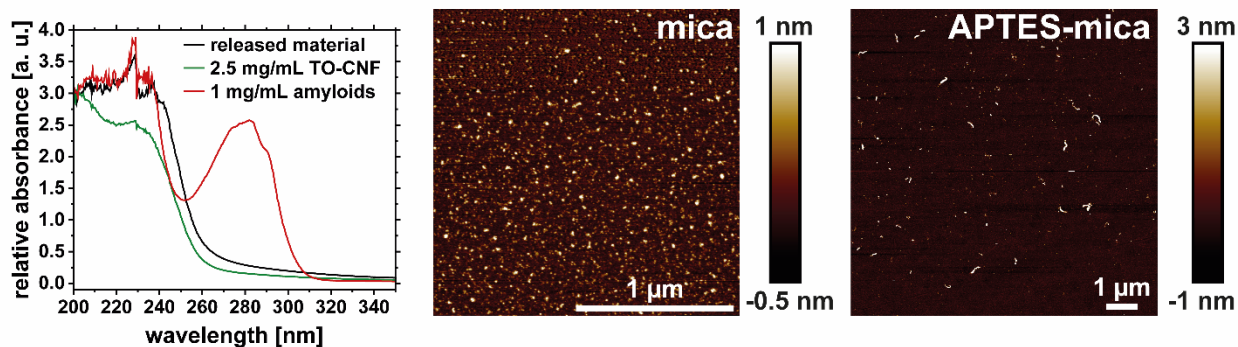

Figure S6: UV-vis spectrum of the material released from the TO-CNF nanopaper coated with HEWL amyloids (immersion of the film in MilliQ water for 48 h). For reference spectra of a 1 mg/mL amyloid fibril solution and a 2.5 mg/mL TO-CNF suspension are shown. The AFM images show the released material adsorbed onto freshly cleaved mica (negatively charged, adsorbing only positively charged peptides released from the coated nanopaper) and APTES-modified mica (positively charged, adsorbing negatively charged TO-CNFs released).

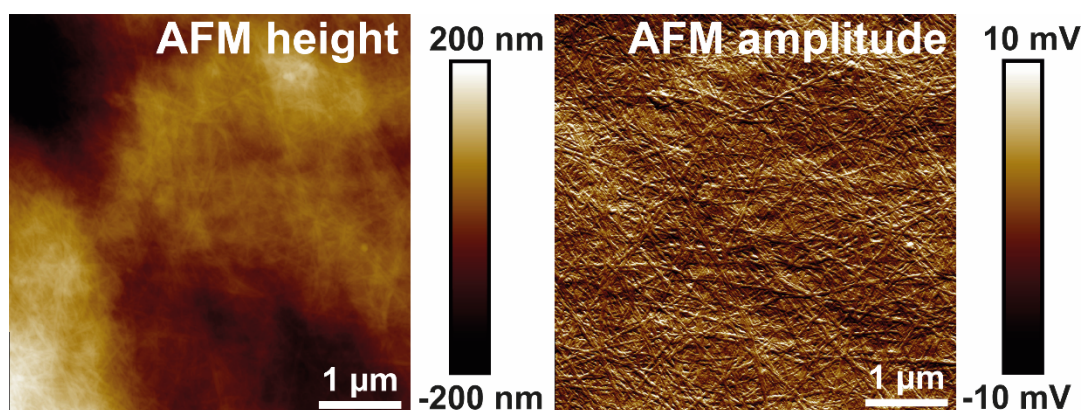

Figure S7: AFM height and amplitude images of a TO-CNF nanopaper coated with HEWL amyloids after immersion in MilliQ water and drying.
